# Supplementary material for: Wnt5a is a crucial regulator of neurogenesis during cerebellum development
Source: Sci Rep. 2017 Feb 16;7:42523. doi: 10.1038/srep42523 (PMC5311982; doi:10.1038/srep42523)
Supplement: Supplementary Information [file srep42523-s1.pdf]

## Supplementary Information

**Title: Wnt5a is a crucial regulator of neurogenesis during cerebellum development**

Chandramohan Subashini<sup>1</sup>, Sivadasan Bindu Dhanesh<sup>1</sup>, Chih-Ming Chen<sup>2</sup>, Paul Ann Riya<sup>1</sup>, Vadakkath Meera<sup>1</sup>, Thulasi Sheela Divya<sup>1</sup>, Rejji Kuruvilla<sup>2</sup>, Kerstin Buttler<sup>3</sup> & Jackson James<sup>1\*</sup>

<sup>1</sup> *Neuro Stem Cell Biology Laboratory, Neurobiology Division, Rajiv Gandhi Centre for Biotechnology, Thiruvananthapuram, Kerala-695 014, India*

<sup>2</sup> *Department of Biology, Johns Hopkins University, 3400 N. Charles St., 224 Mudd Hall, Baltimore, MD 21218, USA*

<sup>3</sup> *Department of Anatomy and Cell Biology, University Medicine Göttingen, 37075-Göttingen, Germany*

**Fig. S1**

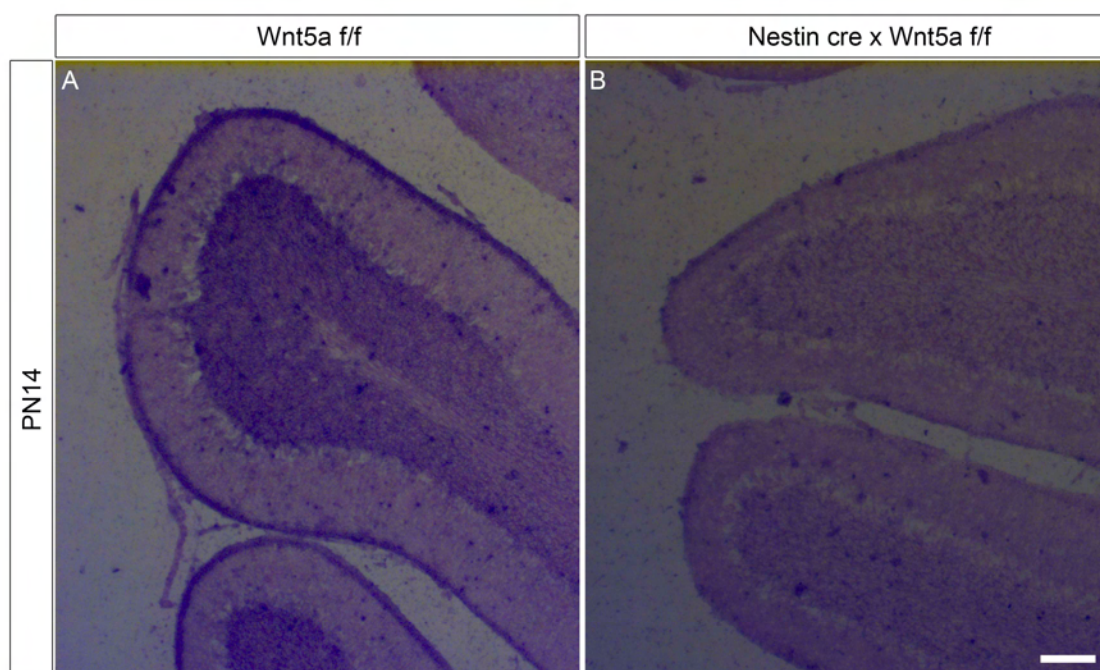

**Fig. S2**

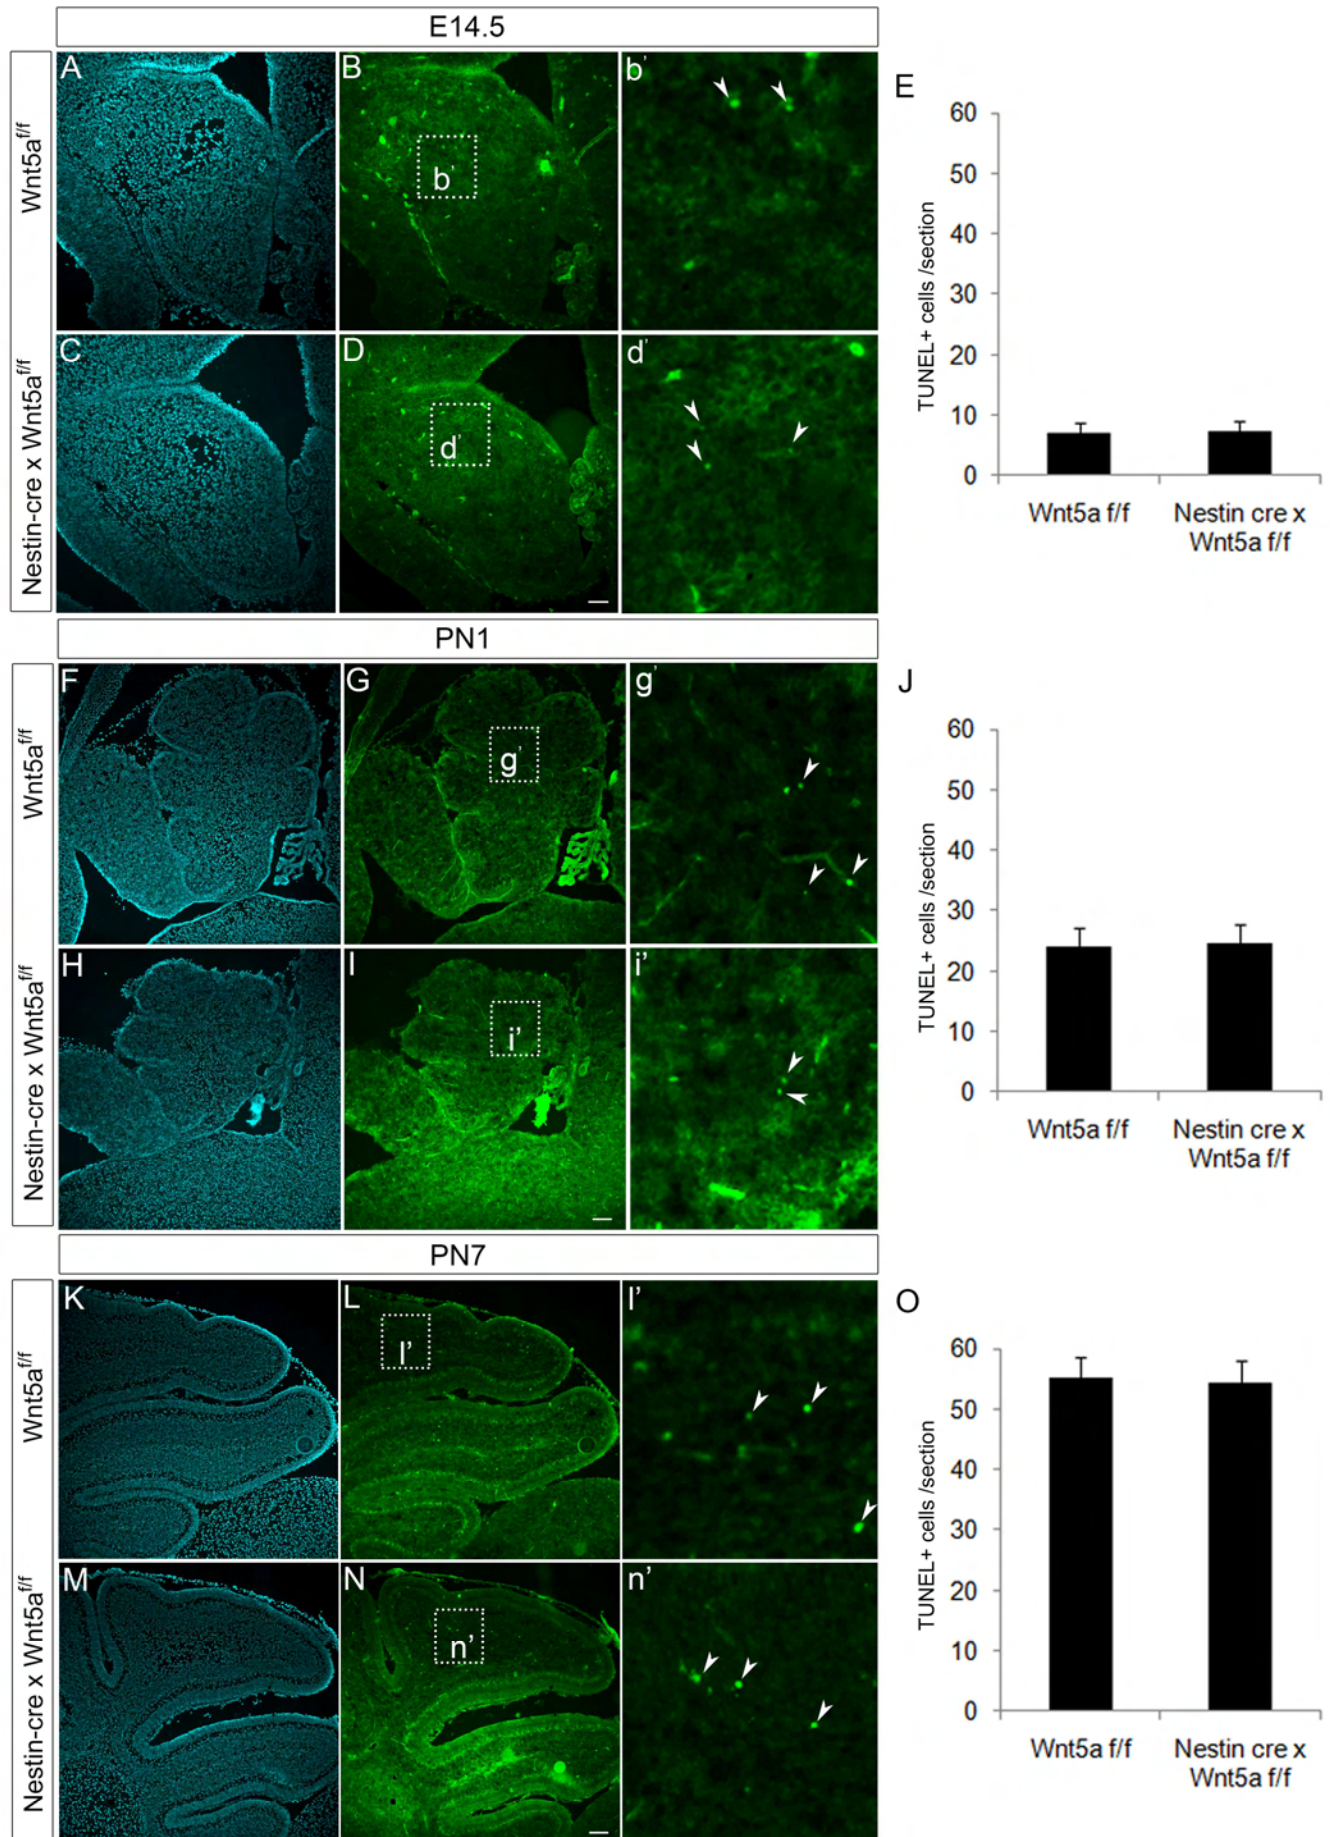

Fig.S3

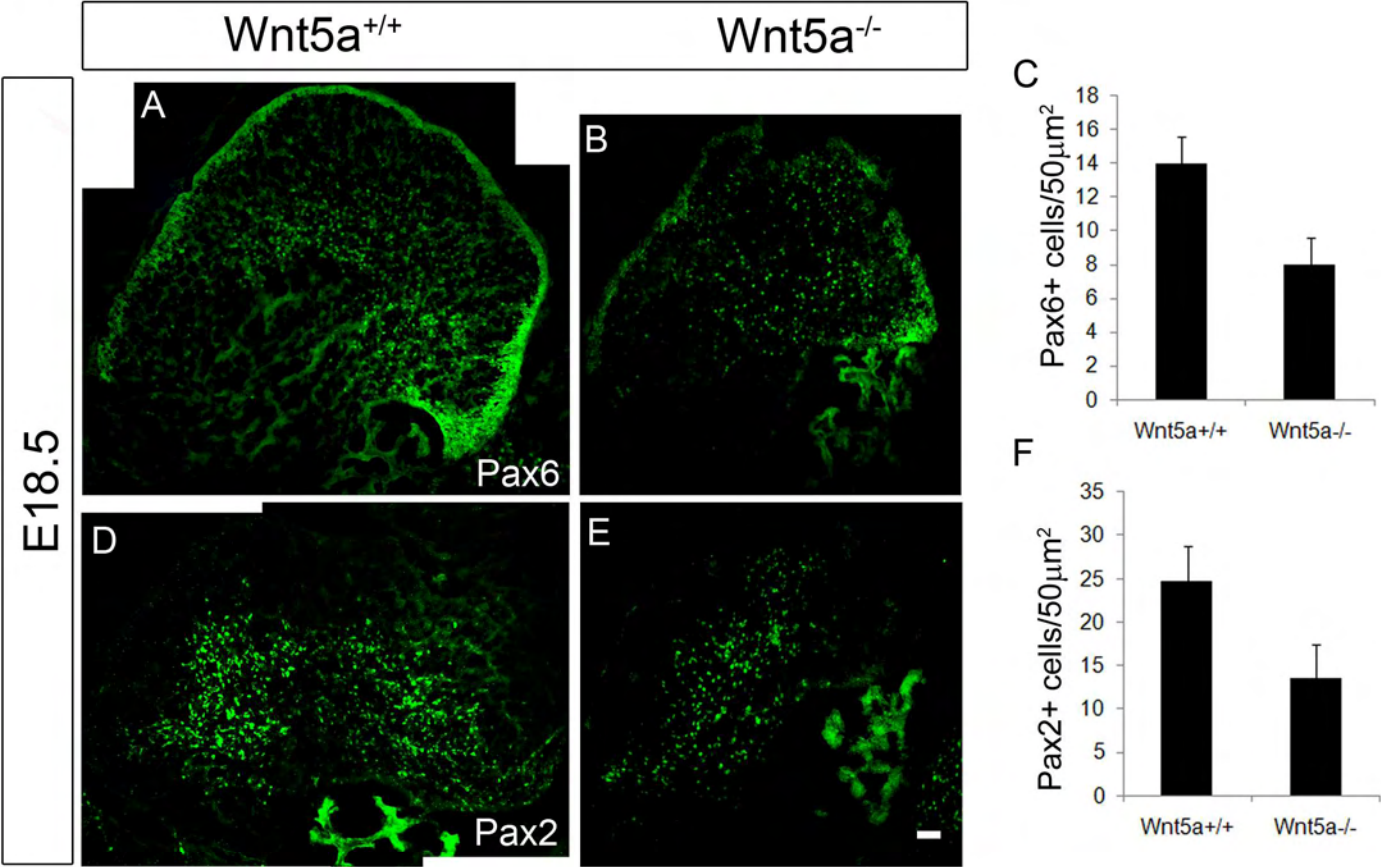

Fig.S4

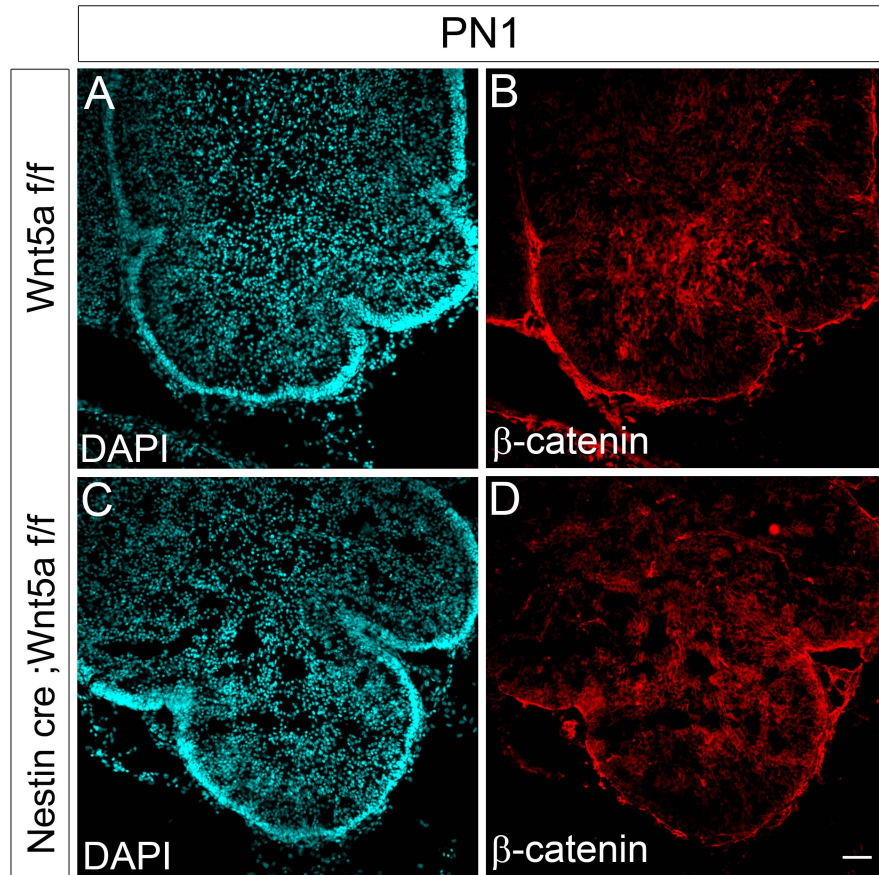

Fig.S5

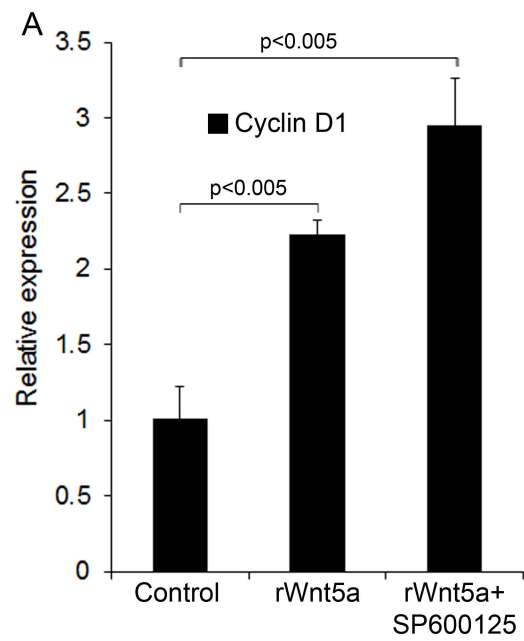

**Table S1: List of primers used for Quantitative RT-PCR analysis**

| <b>Gene Name</b> | <b>Primer Sequence</b>                                  | <b>Ann.<br/>Temp<br/>(°C)</b> | <b>Product<br/>Size (bp)</b> |
|------------------|---------------------------------------------------------|-------------------------------|------------------------------|
| <b>β-actin</b>   | F- AGACTTCGAGCAGGAGATG<br>R- CTTGATCTTCATGGTGCTAGG      | 56                            | 322                          |
| <b>Hes-1</b>     | F- TCAACACGACACCGGACAAAC<br>R- TTCATGCACTCGCTGAAGCC     | 56                            | 295                          |
| <b>Hes-5</b>     | F- CAAGGAGAAAAACCGACTGCG<br>R- GGTAAGCAGCTTCATCTGCG     | 56                            | 314                          |
| <b>Sox2</b>      | F- CCAAGACGCTCATGAAGAAG<br>R- TGGTCATGGAGTTGTACTGC      | 60                            | 288                          |
| <b>Cyclin D1</b> | F- GGAAGTGTCTTCTTCTGGTGAACAAG<br>R- TGGAGGGTGGGTTGGAATG | 58                            | 185                          |

## Supplementary Figure Legend

**Figure S1: Wnt5a expression is lost in Nestin-Cre conditional knockout mutant cerebella. (A-B)** *In situ* hybridization analysis using Wnt5a specific DIG labelled probes indicates loss of Wnt5a expression in Wnt5a cKO (B) as compared to Wt-type controls (A) at PN14 stage. Scale Bar = 50  $\mu$ m.

**Figure S2: Analysis of cell death in control and Wnt5a cKO using TUNEL assay. (A-E, F-J&K-O)** TUNEL assay revealed no significant difference in number of TUNEL<sup>+</sup> cells at E14.5, PN1 and PN7 respectively. **(b'&d')** Magnified view of selected area in B and C. **(g'&i')** Magnified view of selected area in G and I. **(l'&n')** Magnified view of selected area in L and N. Arrowheads indicate the TUNEL<sup>+</sup> cells at each stage. Data expressed as Mean  $\pm$  SD,  $n=3$ . Scale. Bar = 50  $\mu$ m.

**Figure S3: Wnt5a<sup>-/-</sup> null mutants exhibit severe reduction in GABAergic interneuron and granule neuron progenitors. (A-B)** Immunohistochemical analysis using Pax6 antibody showed significant reduction in granule neuron progenitors in Wnt5a<sup>-/-</sup> null mutants at E18.5 compared to Wnt5a<sup>+/+</sup> controls **(C)** Quantitation of Pax6<sup>+</sup> cells in Wnt5a<sup>+/+</sup> control and Wnt5a<sup>-/-</sup> mutants. **(D-E)** Immunostaining of Pax2 at E18.5 stage in Wnt5a<sup>+/+</sup> and Wnt5a<sup>-/-</sup> sagittal cerebellar sections. **(F)** Quantitative analysis indicates significant reduction of Pax2<sup>+</sup> cells in Wnt5a<sup>-/-</sup> mutants as compared to Wnt5a<sup>+/+</sup> control. Data expressed as Mean  $\pm$  SD,  $n=3$ . Scale. Bar = 50  $\mu$ m.

**Figure S4: Wnt5a cKo animals do not exhibit any difference in  $\beta$ -catenin expression. (A-D)** Immunohistochemical analysis using  $\beta$ -catenin antibody did not show any significant difference in expression of  $\beta$ -catenin between PN1 wnt5a<sup>fl/fl</sup> and Nestin-cre;Wnt5a<sup>fl/fl</sup>. Scale. Bar = 50  $\mu$ m.

**Figure S5: Wnt5a does not activate non-canonical JNK signalling during cerebellar development. (A)** Treatment of CGN cultures with rWnt5a and JNK inhibitor SP600125 did not show any down regulation in expression of Cyclin D1 excluding the involvement of non-canonical Wnt5a mediated JNK activation. Data expressed as Mean  $\pm$  SD,  $n=3$ .

**Table S1:** List of primers used
